# Supplementary material for: Identification of genes involved in the ACC-mediated control of root cell elongation in Arabidopsis thaliana
Source: PubMed Central journal article supplement (PMC3502322; doi:10.1186/1471-2229-12-208), 2012-11-07
Supplement: 1471-2229-12-208-S1.pdf [file 1471-2229-12-208-S1.pdf]

| Gene identifier | Function                                                                                                                             | Rat  | Pval     |
|-----------------|--------------------------------------------------------------------------------------------------------------------------------------|------|----------|
| AT3G59900       | ARGOS                                                                                                                                | 3,61 | 0,00E+0  |
| AT5G19890       | peroxidase, putative                                                                                                                 | 2,72 | 0,00E+0  |
| AT2G44080       | ARGOS-like                                                                                                                           | 2,15 | 0,00E+0  |
| AT5G53980       | homeobox-leucine zipper family protein                                                                                               | 2,07 | 0,00E+0  |
| AT5G20820       | auxin-responsive protein-related                                                                                                     | 1,99 | 0,00E+0  |
| AT5G25340       | expressed protein                                                                                                                    | 1,86 | 0,00E+0  |
| AT2G39980       | transferase family protein                                                                                                           | 1,83 | 0,00E+0  |
| AT4G28050       | senescence-associated protein, putative                                                                                              | 1,75 | 0,00E+0  |
| AT1G49570       | peroxidase, putative                                                                                                                 | 1,65 | 0,00E+0  |
| AT4G34110       | polyadenylate-binding protein 2 (PABP2)                                                                                              | 1,64 | 0,00E+0  |
| AT4G35160       | O-methyltransferase family 2 protein                                                                                                 | 1,60 | 0,00E+0  |
| AT3G49960       | peroxidase, putative                                                                                                                 | 1,52 | 0,00E+0  |
| AT5G54490       | calcium-binding EF-hand protein, putative                                                                                            | 1,51 | 0,00E+0  |
| AT2G41090       | calmodulin-like calcium-binding protein, 22 kDa (CaBP-22)                                                                            | 1,50 | 0,00E+0  |
| AT5G52640       | heat shock protein 81-1 (HSP81-1) / heat shock protein 83 (HSP83)                                                                    | 1,49 | 0,00E+0  |
| AT4G26220       | caffeoyl-CoA 3-O-methyltransferase, putative                                                                                         | 1,47 | 0,00E+0  |
| AT5G14780       | formate dehydrogenase (FDH)                                                                                                          | 1,47 | 0,00E+0  |
| AT5G01210       | transferase family protein                                                                                                           | 1,46 | 0,00E+0  |
| AT2G43590       | chitinase, putative                                                                                                                  | 1,45 | 0,00E+0  |
| AT2G42850       | cytochrome P450 family protein                                                                                                       | 1,42 | 0,00E+0  |
| AT5G47220       | ethylene-responsive element-binding factor 2 (ERF2)                                                                                  | 1,42 | 0,00E+0  |
| AT5G59540       | oxidoreductase, 2OG-Fe(II) oxygenase family protein                                                                                  | 1,41 | 0,00E+0  |
| AT2G22880       | VQ motif-containing protein                                                                                                          | 1,41 | 0,00E+0  |
| AT2G26070       | RTE1 (REVERSION-TO-ETHYLENE SENSITIVITY1)                                                                                            | 1,40 | 0,00E+0  |
| AT3G33002       | pseudogene, ribosomal protein S2p family                                                                                             | 1,39 | 0,00E+0  |
| AT5G40590       | DC1 domain-containing protein                                                                                                        | 1,38 | 0,00E+0  |
| AT3G25730       | AP2 domain-containing transcription factor, putative                                                                                 | 1,37 | 0,00E+0  |
| AT1G18100       | mother of FT and TF1 protein (MFT)                                                                                                   | 1,35 | 0,00E+0  |
| AT4G01870       | tolB protein-related                                                                                                                 | 1,34 | 5,61E-12 |
| AT1G04310       | ethylene receptor-related                                                                                                            | 1,34 | 5,61E-12 |
| AT2G38240       | oxidoreductase, 2OG-Fe(II) oxygenase family protein                                                                                  | 1,31 | 1,68E-11 |
| AT4G34540       | isoflavone reductase family protein                                                                                                  | 1,29 | 3,93E-11 |
| AT5G51440       | 23.5 kDa mitochondrial small heat shock protein (HSP23.5-M)                                                                          | 1,26 | 2,30E-10 |
| AT5G25450       | ubiquinol-cytochrome C reductase complex 14 kDa protein, putative                                                                    | 1,25 | 3,98E-10 |
| AT4G38410       | dehydrin, putative                                                                                                                   | 1,24 | 4,49E-10 |
| AT4G02520       | glutathione S-transferase, putative                                                                                                  | 1,24 | 4,60E-10 |
| AT5G13330       | AP2 domain-containing transcription factor family protein                                                                            | 1,24 | 4,94E-10 |
| AT5G10770       | chloroplast nucleoid DNA-binding protein, putative                                                                                   | 1,23 | 7,58E-10 |
| AT1G55920       | serine O-acetyltransferase, putative                                                                                                 | 1,23 | 9,54E-10 |
| AT5G06860       | polygalacturonase inhibiting protein 1 (PGIP1)                                                                                       | 1,22 | 1,25E-9  |
| AT1G43160       | AP2 domain-containing protein RAP2.6 (RAP2.6)                                                                                        | 1,21 | 2,02E-9  |
| AT4G24960       | ABA-responsive protein (HVA22d)                                                                                                      | 1,21 | 2,12E-9  |
| AT5G39050       | transferase family protein                                                                                                           | 1,21 | 2,61E-9  |
| AT1G79160       | expressed protein                                                                                                                    | 1,20 | 3,66E-9  |
| AT4G28850       | xyloglucan:xyloglucosyl transferase, putative / xyloglucan endotransglycosylase, putative / endo-xyloglucan transferase, putative    | 1,19 | 6,36E-9  |
| AT4G36990       | heat shock factor protein 4 (HSF4) / heat shock transcription factor 4 (HSTF4)                                                       | 1,18 | 1,10E-8  |
| AT1G61890       | MATE efflux family protein                                                                                                           | 1,17 | 1,33E-8  |
| AT1G07400       | 17.8 kDa class I heat shock protein (HSP17.8-CI)                                                                                     | 1,15 | 3,94E-8  |
| AT3G44990       | xyloglucan:xyloglucosyl transferase, putative / xyloglucan endotransglycosylase, putative / endo-xyloglucan transferase, putative    | 1,14 | 4,43E-8  |
| AT3G46230       | 17.4 kDa class I heat shock protein (HSP17.4-CI)                                                                                     | 1,14 | 5,69E-8  |
| AT5G02760       | protein phosphatase 2C family protein / PP2C family protein                                                                          | 1,13 | 8,53E-8  |
| AT2G41410       | calmodulin, putative                                                                                                                 | 1,13 | 9,31E-8  |
| AT2G07671       | H <sup>+</sup> -transporting two-sector ATPase, C subunit family protein                                                             | 1,13 | 9,71E-8  |
| AT1G75390       | bZIP transcription factor family protein                                                                                             | 1,12 | 1,15E-7  |
| AT4G37390       | auxin-responsive GH3 family protein                                                                                                  | 1,12 | 1,58E-7  |
| AT1G78000       | sulfate transporter (Sultr1;2)                                                                                                       | 1,12 | 1,60E-7  |
| AT1G19900       | glyoxal oxidase-related                                                                                                              | 1,11 | 1,62E-7  |
| AT4G30430       | senescence-associated family protein                                                                                                 | 1,11 | 1,87E-7  |
| AT1G02850       | glycosyl hydrolase family 1 protein                                                                                                  | 1,10 | 2,50E-7  |
| AT1G77120       | alcohol dehydrogenase (ADH)                                                                                                          | 1,10 | 2,55E-7  |
| AT1G60010       | expressed protein                                                                                                                    | 1,10 | 2,89E-7  |
| AT5G54160       | quercetin 3-O-methyltransferase 1 / flavonol 3-O-methyltransferase 1 / caffeic acid/5-hydroxyferulic acid O-methyltransferase (OMT1) | 1,10 | 3,40E-7  |
| AT3G15370       | expansin, putative (EXP12)                                                                                                           | 1,09 | 5,63E-7  |
| AT4G02380       | late embryogenesis abundant 3 family protein / LEA3 family protein                                                                   | 1,09 | 5,63E-7  |
| AT2G36090       | F-box family protein                                                                                                                 | 1,09 | 5,67E-7  |
| AT3G23030       | auxin-responsive protein / indoleacetic acid-induced protein 2 (IAA2)                                                                | 1,08 | 6,99E-7  |
| AT1G67340       | zinc finger (MYND type) family protein / F-box family protein                                                                        | 1,08 | 7,88E-7  |
| AT2G47550       | pectinesterase family protein                                                                                                        | 1,07 | 9,83E-7  |
| AT3G14230       | AP2 domain-containing protein RAP2.2 (RAP2.2)                                                                                        | 1,07 | 1,32E-6  |
| AT1G74100       | sulfotransferase family protein                                                                                                      | 1,06 | 1,83E-6  |
| AT5G52310       | low-temperature-responsive protein 78 (LTI78) / desiccation-responsive protein 29A (RD29A)                                           | 1,05 | 2,31E-6  |
| AT2G27580       | zinc finger (AN1-like) family protein                                                                                                | 1,05 | 2,78E-6  |
| AT3G51410       | expressed protein                                                                                                                    | 1,04 | 3,93E-6  |
| AT5G49480       | sodium-inducible calcium-binding protein (ACP1) / sodium-responsive calcium-binding protein (ACP1)                                   | 1,03 | 6,09E-6  |
| AT1G79470       | inosine-5prim-monophosphate dehydrogenase                                                                                            | 1,02 | 7,86E-6  |
| AT5G63840       | alpha-glucosidase, putative                                                                                                          | 1,02 | 8,01E-6  |
| AT5G63790       | no apical meristem (NAM) family protein                                                                                              | 1,02 | 8,22E-6  |
| AT3G48990       | AMP-dependent synthetase and ligase family protein                                                                                   | 1,02 | 8,74E-6  |
| AT3G54040       | photoassimilate-responsive protein-related                                                                                           | 1,01 | 1,10E-5  |
| AT3G03990       | esterase/lipase/thioesterase family protein                                                                                          | 1,01 | 1,21E-5  |

|           |                                                                                       |      |         |
|-----------|---------------------------------------------------------------------------------------|------|---------|
| AT2G32270 | zinc transporter (ZIP3)                                                               | 1,01 | 1,36E-5 |
| AT1G23040 | hydroxyproline-rich glycoprotein family protein                                       | 1,01 | 1,07E-2 |
| AT4G02450 | glycine-rich protein                                                                  | 1,00 | 1,90E-5 |
| AT3G07810 | heterogeneous nuclear ribonucleoprotein, putative / hnRNP, putative                   | 1,00 | 2,00E-5 |
| AT3G47510 | expressed protein                                                                     | 1,00 | 2,05E-5 |
| AT3G24420 | hydrolase, alpha/beta fold family protein                                             | 0,99 | 2,22E-5 |
| AT3G55790 | expressed protein                                                                     | 0,99 | 1,45E-2 |
| AT4G34710 | arginine decarboxylase 2 (SPE2)                                                       | 0,99 | 2,50E-5 |
| AT3G09350 | armadillo/beta-catenin repeat family protein                                          | 0,99 | 2,50E-5 |
| AT3G52340 | sucrose-phosphatase 2 (SPP2)                                                          | 0,99 | 2,53E-5 |
| AT2G20560 | DNAJ heat shock family protein                                                        | 0,99 | 2,76E-5 |
| AT5G64090 | expressed protein                                                                     | 0,98 | 3,33E-5 |
| AT1G77330 | 1-aminocyclopropane-1-carboxylate oxidase, putative / ACC oxidase, putative           | 0,97 | 5,50E-5 |
| AT2G29440 | glutathione S-transferase, putative                                                   | 0,97 | 6,19E-5 |
| AT5G05500 | pollen Ole e 1 allergen and extensin family protein                                   | 0,97 | 6,69E-5 |
| AT1G76470 | cinnamoyl-CoA reductase family                                                        | 0,96 | 7,17E-5 |
| AT5G57660 | zinc finger (B-box type) family protein                                               | 0,95 | 1,13E-4 |
| AT4G14030 | selenium-binding protein, putative                                                    | 0,95 | 1,32E-4 |
| AT3G01970 | WRKY family transcription factor                                                      | 0,94 | 1,87E-4 |
| ATMG00990 | NADH dehydrogenase subunit 3                                                          | 0,94 | 1,89E-4 |
| AT3G23150 | ethylene receptor, putative (ETR2)                                                    | 0,93 | 2,22E-4 |
| AT5G17760 | AAA-type ATPase family protein                                                        | 0,93 | 2,41E-4 |
| AT3G11690 | expressed protein                                                                     | 0,93 | 2,84E-4 |
| AT3G18200 | nodulin MtN21 family protein                                                          | 0,93 | 2,89E-4 |
| AT2G18680 | expressed protein                                                                     | 0,93 | 3,00E-4 |
| AT3G28210 | zinc finger (AN1-like) family protein                                                 | 0,92 | 3,45E-4 |
| AT3G14680 | cytochrome P450, putative                                                             | 0,92 | 3,61E-4 |
| AT2G20520 | fasciclin-like arabinogalactan-protein (FLA6)                                         | 0,91 | 5,13E-4 |
| AT5G09440 | phosphate-responsive protein, putative                                                | 0,91 | 5,15E-4 |
| AT2G47270 | expressed protein                                                                     | 0,91 | 5,39E-4 |
| AT1G59740 | proton-dependent oligopeptide transport (POT) family protein                          | 0,90 | 6,97E-4 |
| AT2G07675 | ribosomal protein S12 mitochondrial family protein                                    | 0,90 | 7,37E-4 |
| AT3G10070 | transcription initiation factor IID (TFIID) subunit A family protein                  | 0,90 | 8,45E-4 |
| AT5G02550 | expressed protein                                                                     | 0,89 | 9,19E-4 |
| AT1G19530 | expressed protein                                                                     | 0,89 | 9,71E-4 |
| AT5G10625 | expressed protein                                                                     | 0,89 | 1,07E-3 |
| AT2G37970 | SOUL heme-binding family protein                                                      | 0,88 | 1,36E-3 |
| AT5G03670 | expressed protein                                                                     | 0,88 | 1,43E-3 |
| AT2G47950 | expressed protein                                                                     | 0,88 | 1,45E-3 |
| AT2G37750 | expressed protein                                                                     | 0,88 | 1,66E-3 |
| AT4G24480 | serine/threonine protein kinase, putative                                             | 0,87 | 2,03E-3 |
| AT3G49940 | LOB domain protein 38 / lateral organ boundaries domain protein 38 (LBD38)            | 0,87 | 2,03E-3 |
| AT1G58170 | disease resistance-responsive protein-related / dirigent protein-related              | 0,87 | 2,33E-3 |
| AT5G62280 | expressed protein                                                                     | 0,87 | 2,39E-3 |
| AT2G36080 | DNA-binding protein, putative                                                         | 0,86 | 2,47E-3 |
| AT5G25110 | CBL-interacting protein kinase 25 (CIPK25)                                            | 0,86 | 2,66E-3 |
| AT2G24260 | basic helix-loop-helix (bHLH) family protein                                          | 0,86 | 2,70E-3 |
| AT5G51830 | pfkB-type carbohydrate kinase family protein                                          | 0,86 | 2,83E-3 |
| AT2G47730 | glutathione S-transferase 6 (GST6)                                                    | 0,86 | 2,96E-3 |
| AT1G10140 | expressed protein                                                                     | 0,86 | 2,99E-3 |
| AT1G76180 | dehydrin (ERD14)                                                                      | 0,86 | 3,29E-3 |
| AT5G13180 | no apical meristem (NAM) family protein                                               | 0,85 | 3,65E-3 |
| AT1G73480 | hydrolase, alpha/beta fold family protein                                             | 0,85 | 4,03E-3 |
| AT2G19310 | expressed protein                                                                     | 0,85 | 4,05E-3 |
| AT1G02900 | rapid alkalization factor (RALF) family protein                                       | 0,85 | 4,64E-3 |
| AT1G78820 | curculin-like (mannose-binding) lectin family protein / PAN domain-containing protein | 0,85 | 4,79E-3 |
| AT2G47170 | ADP-ribosylation factor 1 (ARF1)                                                      | 0,84 | 5,20E-3 |
| AT3G02470 | adenosylmethionine decarboxylase family protein                                       | 0,84 | 5,33E-3 |
| AT5G10960 | CCR4-NOT transcription complex protein, putative                                      | 0,84 | 6,04E-3 |
| AT3G24500 | ethylene-responsive transcriptional coactivator, putative                             | 0,84 | 6,29E-3 |
| AT1G48690 | auxin-responsive GH3 family protein                                                   | 0,84 | 6,32E-3 |
| AT2G16480 | SWIB complex BAF60b domain-containing protein / plus-3 domain-containing protein      | 0,84 | 6,42E-3 |
| AT1G07350 | transformer serine/arginine-rich ribonucleoprotein, putative                          | 0,83 | 6,81E-3 |
| AT2G30140 | UDP-glucuronosyl/UDP-glucosyl transferase family protein                              | 0,83 | 6,92E-3 |
| AT1G51680 | 4-coumarate--CoA ligase 1 / 4-coumaroyl-CoA synthase 1 (4CL1)                         | 0,82 | 9,80E-3 |
| AT1G22280 | protein phosphatase 2C, putative / PP2C, putative                                     | 0,82 | 1,08E-2 |
| AT1G53560 | expressed protein                                                                     | 0,81 | 1,29E-2 |
| AT3G52870 | calmodulin-binding family protein                                                     | 0,81 | 1,35E-2 |
| AT5G48150 | phytochrome A signal transduction 1 (PAT1)                                            | 0,81 | 1,40E-2 |
| ATMG01275 | NADH dehydrogenase subunit 1                                                          | 0,81 | 1,64E-2 |
| AT4G13040 | AP2 domain-containing transcription factor family protein                             | 0,81 | 1,70E-2 |
| AT5G54280 | myosin heavy chain, putative                                                          | 0,80 | 1,99E-2 |
| AT5G06280 | expressed protein                                                                     | 0,80 | 2,05E-2 |
| AT1G06570 | 4-hydroxyphenylpyruvate dioxygenase (HPD)                                             | 0,80 | 2,27E-2 |
| AT2G37220 | 29 kDa ribonucleoprotein, chloroplast, putative / RNA-binding protein cp29, putative  | 0,80 | 2,35E-2 |
| AT1G62980 | expansin, putative (EXP18)                                                            | 0,80 | 2,38E-2 |
| AT4G39780 | AP2 domain-containing transcription factor, putative                                  | 0,80 | 2,39E-2 |
| AT1G30760 | FAD-binding domain-containing protein                                                 | 0,79 | 2,52E-2 |
| AT1G64720 | expressed protein                                                                     | 0,79 | 2,58E-2 |
| AT5G38200 | expressed protein                                                                     | 0,79 | 2,87E-2 |
| AT5G03380 | heavy-metal-associated domain-containing protein                                      | 0,79 | 2,95E-2 |

|           |                                                                                                                                   |       |          |
|-----------|-----------------------------------------------------------------------------------------------------------------------------------|-------|----------|
| AT3G45300 | isovaleryl-CoA-dehydrogenase (IVD)                                                                                                | 0,78  | 3,36E-2  |
| AT3G01290 | band 7 family protein                                                                                                             | 0,78  | 3,48E-2  |
| AT5G14040 | mitochondrial phosphate transporter                                                                                               | 0,78  | 4,04E-2  |
| AT4G12720 | MutT/nudix family protein                                                                                                         | 0,78  | 4,19E-2  |
| AT3G47540 | chitinase, putative                                                                                                               | 0,77  | 4,71E-2  |
| AT3G20810 | transcription factor jumonji (jmjC) domain-containing protein                                                                     | -0,77 | 4,89E-2  |
| AT1G43580 | expressed protein                                                                                                                 | -0,77 | 4,52E-2  |
| AT5G42630 | myb family transcription factor (KAN4)                                                                                            | -0,78 | 4,23E-2  |
| AT2G29550 | tubulin beta-7 chain (TUB7)                                                                                                       | -0,79 | 2,85E-2  |
| AT1G22880 | glycosyl hydrolase family 9 protein                                                                                               | -0,79 | 2,66E-2  |
| AT5G60520 | late embryogenesis abundant protein-related / LEA protein-related                                                                 | -0,80 | 2,18E-2  |
| AT2G48140 | protease inhibitor/seed storage/lipid transfer protein (LTP) family protein                                                       | -0,80 | 2,13E-2  |
| AT5G23750 | remorin family protein                                                                                                            | -0,80 | 1,87E-2  |
| AT1G54000 | myrosinase-associated protein, putative                                                                                           | -0,80 | 1,87E-2  |
| AT2G26370 | MD-2-related lipid recognition domain-containing protein / ML domain-containing protein                                           | -0,80 | 1,86E-2  |
| AT3G19710 | branched-chain amino acid aminotransferase, putative / branched-chain amino acid transaminase, putative (BCAT4)                   | -0,80 | 1,78E-2  |
| AT4G24190 | shepherd protein (SHD) / clavata formation protein, putative                                                                      | -0,81 | 1,64E-2  |
| AT2G37460 | nodulin MtN21 family protein                                                                                                      | -0,82 | 1,20E-2  |
| AT4G26130 | expressed protein                                                                                                                 | -0,82 | 1,18E-2  |
| AT1G16400 | cytochrome P450 family protein                                                                                                    | -0,82 | 1,16E-2  |
| AT1G03870 | fasciclin-like arabinogalactan-protein (FLA9)                                                                                     | -0,82 | 1,04E-2  |
| AT1G57590 | pectinacetyltransferase, putative                                                                                                 | -0,82 | 1,01E-2  |
| AT3G56000 | glycosyl transferase family 2 protein                                                                                             | -0,83 | 9,05E-3  |
| AT4G12420 | multi-copper oxidase, putative (SKU5)                                                                                             | -0,83 | 8,96E-3  |
| AT1G09760 | U2 small nuclear ribonucleoprotein A, putative                                                                                    | -0,83 | 7,06E-3  |
| AT4G37400 | cytochrome P450 family protein                                                                                                    | -0,83 | 6,82E-3  |
| AT1G53830 | pectinesterase family protein                                                                                                     | -0,84 | 6,17E-3  |
| AT4G17280 | auxin-responsive family protein                                                                                                   | -0,84 | 6,17E-3  |
| AT5G42600 | pentacyclic triterpene synthase, putative                                                                                         | -0,84 | 5,89E-3  |
| AT5G22940 | exostosin family protein                                                                                                          | -0,84 | 5,41E-3  |
| AT5G09980 | expressed protein                                                                                                                 | -0,84 | 5,38E-3  |
| AT2G14890 | arabinogalactan-protein (AGP9)                                                                                                    | -0,86 | 3,40E-3  |
| AT1G09620 | tRNA synthetase class I (I, L, M and V) family protein                                                                            | -0,87 | 2,03E-3  |
| AT5G23210 | serine carboxypeptidase S10 family protein                                                                                        | -0,88 | 1,43E-3  |
| AT3G01260 | aldose 1-epimerase family protein                                                                                                 | -0,88 | 1,37E-3  |
| AT2G33830 | dormancy/auxin associated family protein                                                                                          | -0,88 | 1,27E-3  |
| AT4G12030 | bile acid:sodium symporter family protein                                                                                         | -0,89 | 1,24E-3  |
| AT3G49190 | condensation domain-containing protein                                                                                            | -0,89 | 1,22E-3  |
| AT3G44330 | expressed protein                                                                                                                 | -0,89 | 1,19E-3  |
| AT2G13550 | expressed protein                                                                                                                 | -0,89 | 1,15E-3  |
| AT4G19030 | major intrinsic family protein / MIP family protein                                                                               | -0,90 | 7,33E-4  |
| AT1G17190 | glutathione S-transferase, putative                                                                                               | -0,91 | 5,82E-4  |
| AT4G16660 | heat shock protein 70, putative / HSP70, putative                                                                                 | -0,91 | 5,42E-4  |
| AT5G04120 | phosphoglycerate/bisphosphoglycerate mutase family protein                                                                        | -0,91 | 5,21E-4  |
| AT3G58990 | aconitase C-terminal domain-containing protein                                                                                    | -0,92 | 3,84E-4  |
| AT4G31910 | transferase family protein                                                                                                        | -0,92 | 3,37E-4  |
| AT2G34770 | fatty acid hydroxylase (FAH1)                                                                                                     | -0,94 | 1,93E-4  |
| AT1G45015 | MD-2-related lipid recognition domain-containing protein / ML domain-containing protein                                           | -0,95 | 1,21E-4  |
| AT5G41080 | glycerophosphoryl diester phosphodiesterase family protein                                                                        | -0,95 | 1,10E-4  |
| AT1G78860 | curculin-like (mannose-binding) lectin family protein                                                                             | -0,95 | 1,00E-4  |
| AT3G51280 | male sterility MS5, putative                                                                                                      | -0,96 | 8,92E-5  |
| AT1G12080 | expressed protein                                                                                                                 | -0,96 | 7,29E-5  |
| AT5G08330 | TCP family transcription factor, putative                                                                                         | -0,97 | 6,83E-5  |
| AT4G28440 | DNA-binding protein-related                                                                                                       | -0,97 | 6,76E-5  |
| AT3G48340 | cysteine proteinase, putative                                                                                                     | -0,99 | 2,71E-5  |
| AT4G30290 | xyloglucan:xyloglucosyl transferase, putative / xyloglucan endotransglycosylase, putative / endo-xyloglucan transferase, putative | -1,03 | 6,69E-6  |
| AT5G53250 | arabinogalactan-protein, putative (AGP22)                                                                                         | -1,03 | 5,41E-6  |
| AT5G07990 | flavonoid 3prim-monoxygenase/flavonoid 3prim-hydroxylase (F3primH)/cytochrome P450 75B1 (CYP75B1)/transparent testa 7 protein     | -1,04 | 4,24E-6  |
| AT5G10430 | arabinogalactan-protein (AGP4)                                                                                                    | -1,04 | 3,57E-6  |
| AT5G25090 | plastocyanin-like domain-containing protein                                                                                       | -1,08 | 8,48E-7  |
| AT2G40080 | ELF4 (EARLY FLOWERING 4)                                                                                                          | -1,08 | 6,64E-7  |
| AT4G27400 | late embryogenesis abundant protein-related / LEA protein-related                                                                 | -1,12 | 1,16E-7  |
| AT3G06460 | GNS1/SUR4 membrane family protein                                                                                                 | -1,16 | 1,97E-8  |
| AT2G20750 | beta-expansin, putative (EXPB1)                                                                                                   | -1,19 | 4,85E-9  |
| AT4G33625 | expressed protein                                                                                                                 | -1,23 | 8,25E-10 |
| AT1G29020 | calcium-binding EF hand family protein                                                                                            | -1,25 | 3,82E-10 |
| AT4G02290 | glycosyl hydrolase family 9 protein                                                                                               | -1,25 | 2,97E-10 |
| AT3G05900 | neurofilament protein-related                                                                                                     | -1,28 | 8,98E-11 |
| AT2G25150 | transferase family protein                                                                                                        | -1,28 | 6,73E-11 |
| AT4G28250 | beta-expansin, putative (EXPB3)                                                                                                   | -1,29 | 4,49E-11 |
| AT3G25190 | nodulin, putative                                                                                                                 | -1,37 | 0,00E+0  |
| AT2G33790 | pollen Ole e 1 allergen and extensin family protein                                                                               | -1,38 | 0,00E+0  |
| AT5G42590 | cytochrome P450 71A16, putative (CYP71A16)                                                                                        | -1,42 | 0,00E+0  |
| AT2G18800 | xyloglucan:xyloglucosyl transferase, putative / xyloglucan endotransglycosylase, putative / endo-xyloglucan transferase, putative | -1,44 | 0,00E+0  |
| AT4G25250 | invertase/pectin methyltransferase inhibitor family protein                                                                       | -1,56 | 0,00E+0  |
| AT1G64390 | endo-1,4-beta-glucanase, putative / cellulase, putative                                                                           | -1,60 | 0,00E+0  |
| AT4G35100 | plasma membrane intrinsic protein (SIMIP)                                                                                         | -1,61 | 0,00E+0  |
| AT4G01630 | expansin, putative (EXP17)                                                                                                        | -1,76 | 0,00E+0  |
| AT3G18000 | phosphoethanolamine N-methyltransferase 1 / PEAMT 1 (NMT1)                                                                        | -1,78 | 0,00E+0  |
