# Supplementary material for: Identification of genes involved in the ACC-mediated control of root cell elongation in Arabidopsis thaliana
Source: PubMed Central journal article supplement (PMC3502322; doi:10.1186/1471-2229-12-208), 2012-11-07

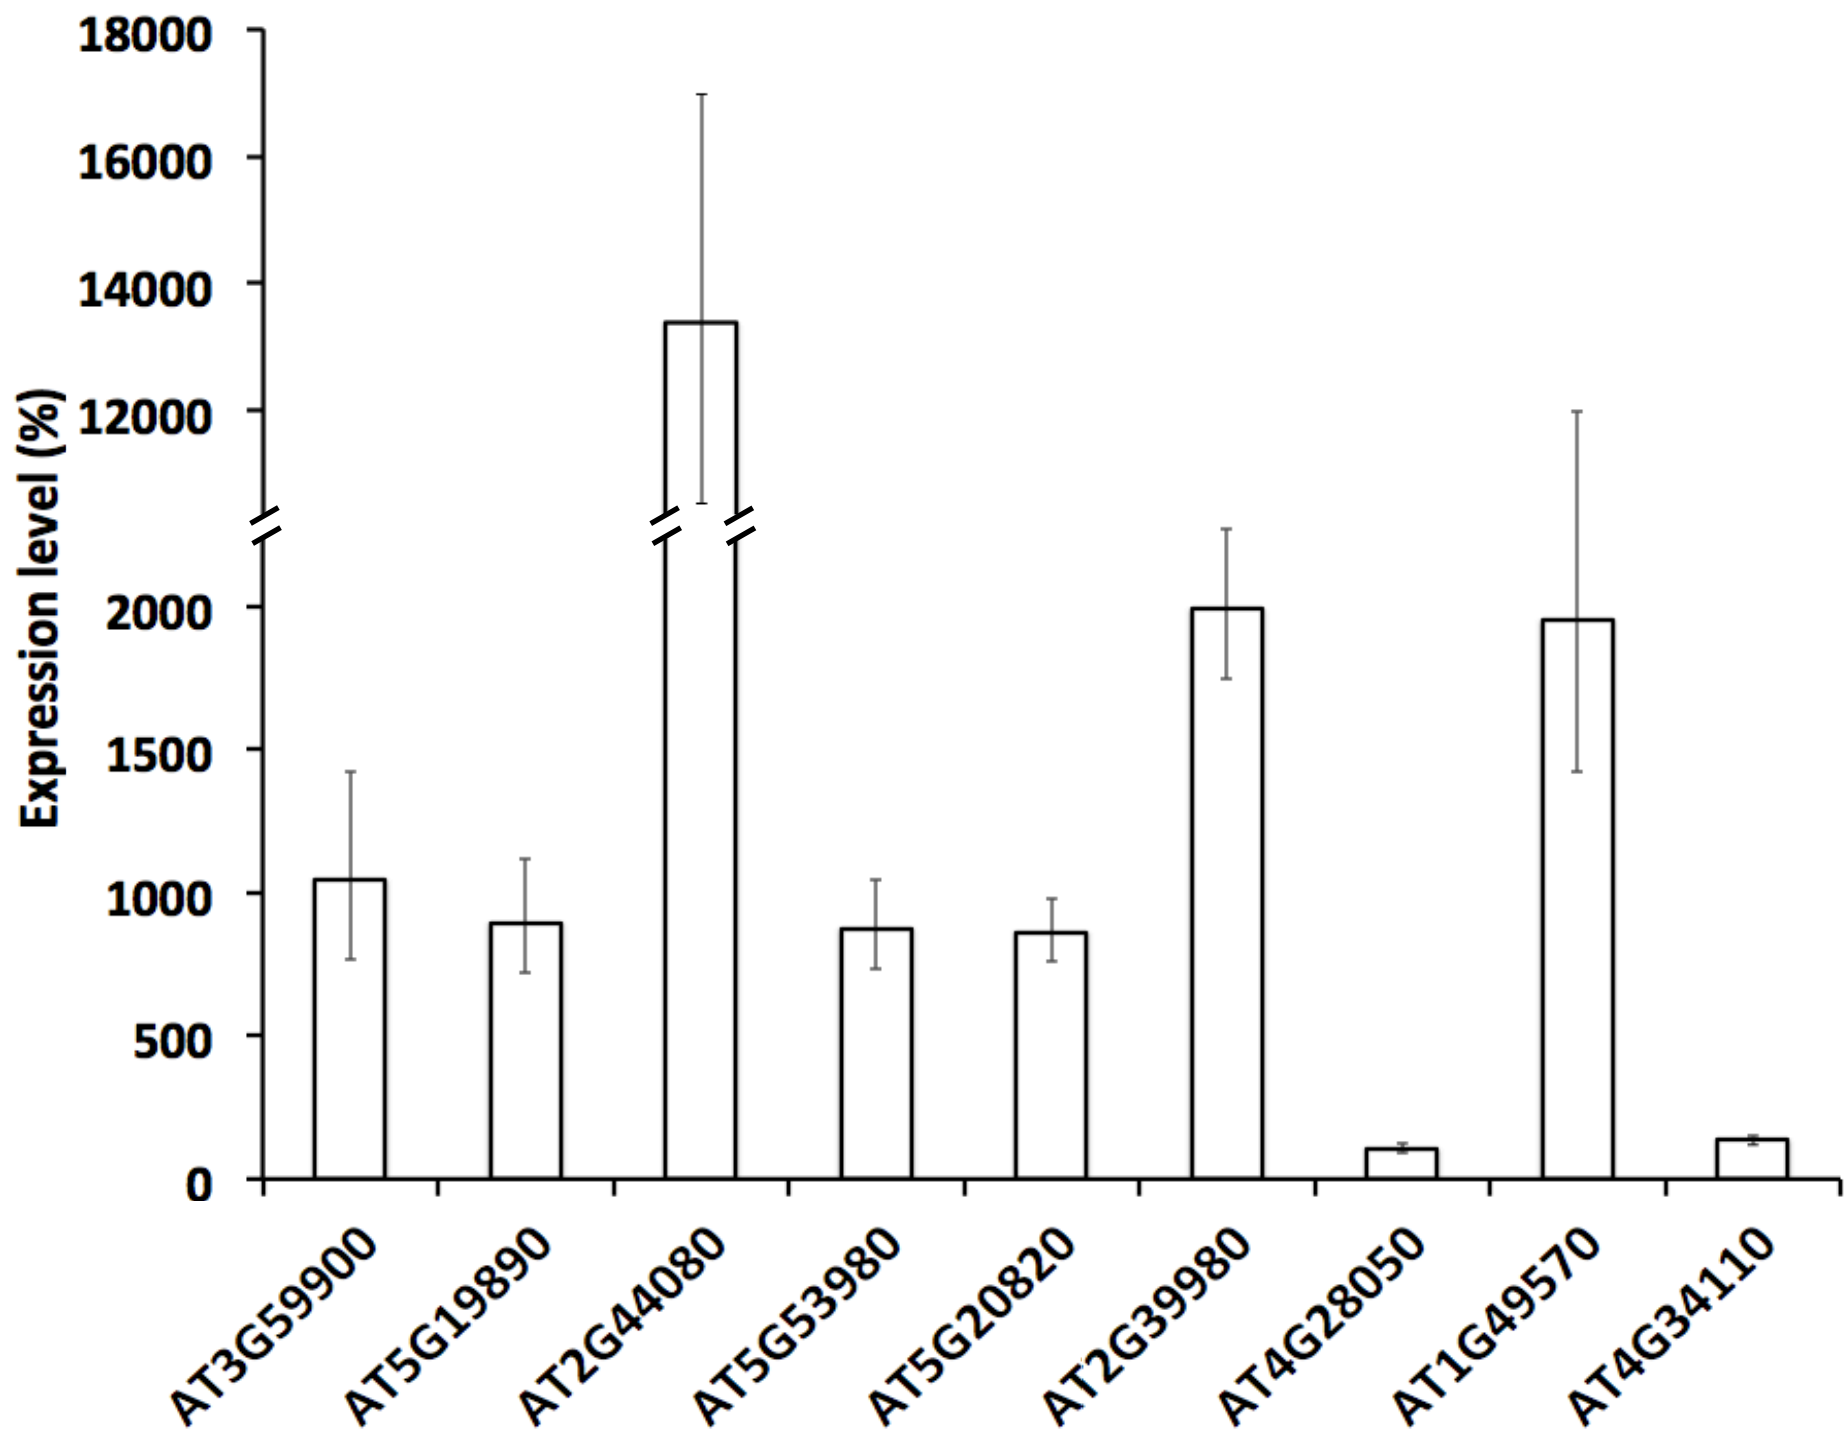

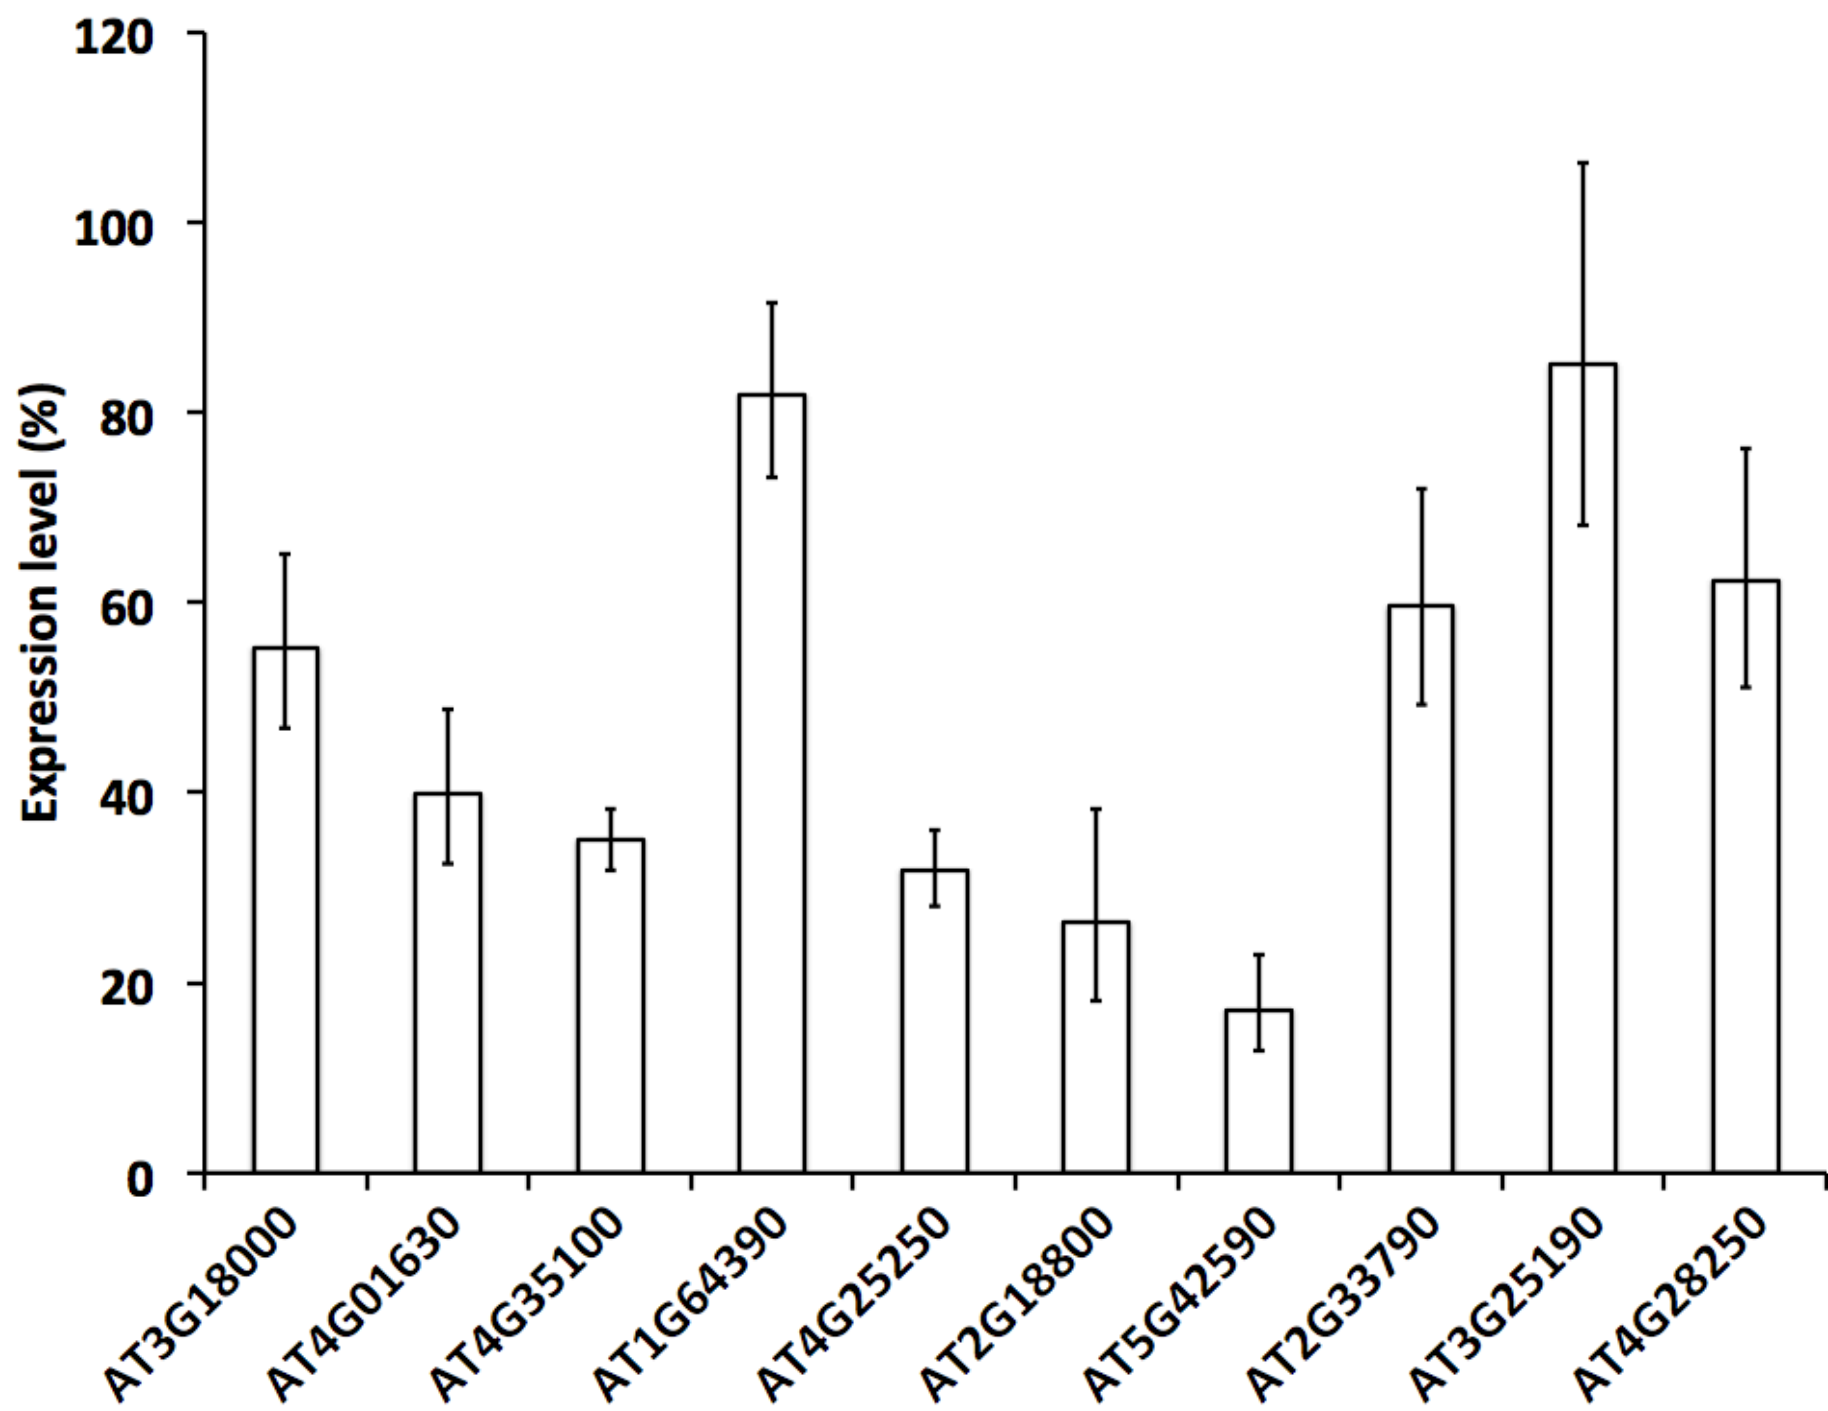

Supplement: 1471-2229-12-208-S2.pdf [file 1471-2229-12-208-S2.pdf]
