# Supplementary material for: Identification of genes involved in the ACC-mediated control of root cell elongation in Arabidopsis thaliana
Source: PubMed Central journal article supplement (PMC3502322; doi:10.1186/1471-2229-12-208), 2012-11-07
Supplement: 1471-2229-12-208-S3.pdf [file 1471-2229-12-208-S3.pdf]

**A**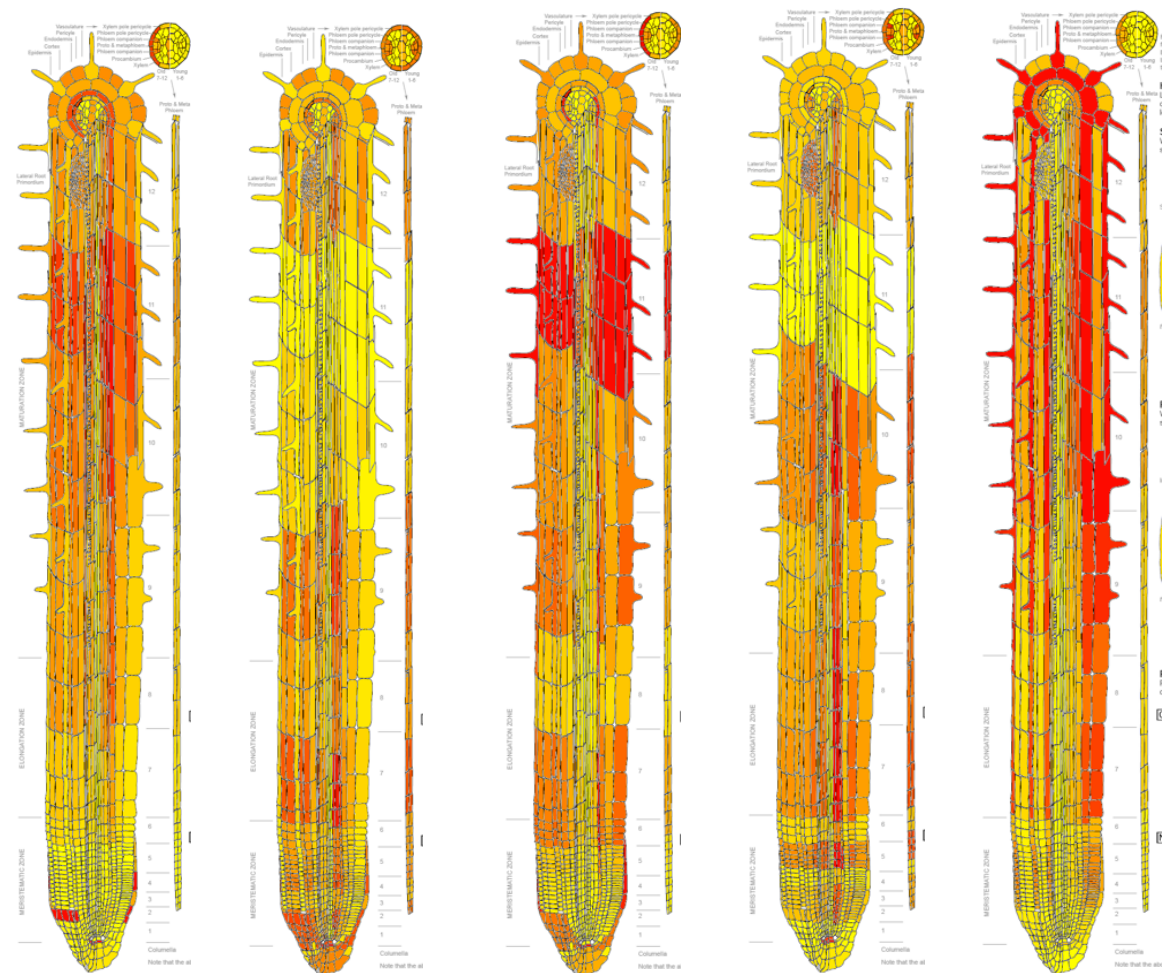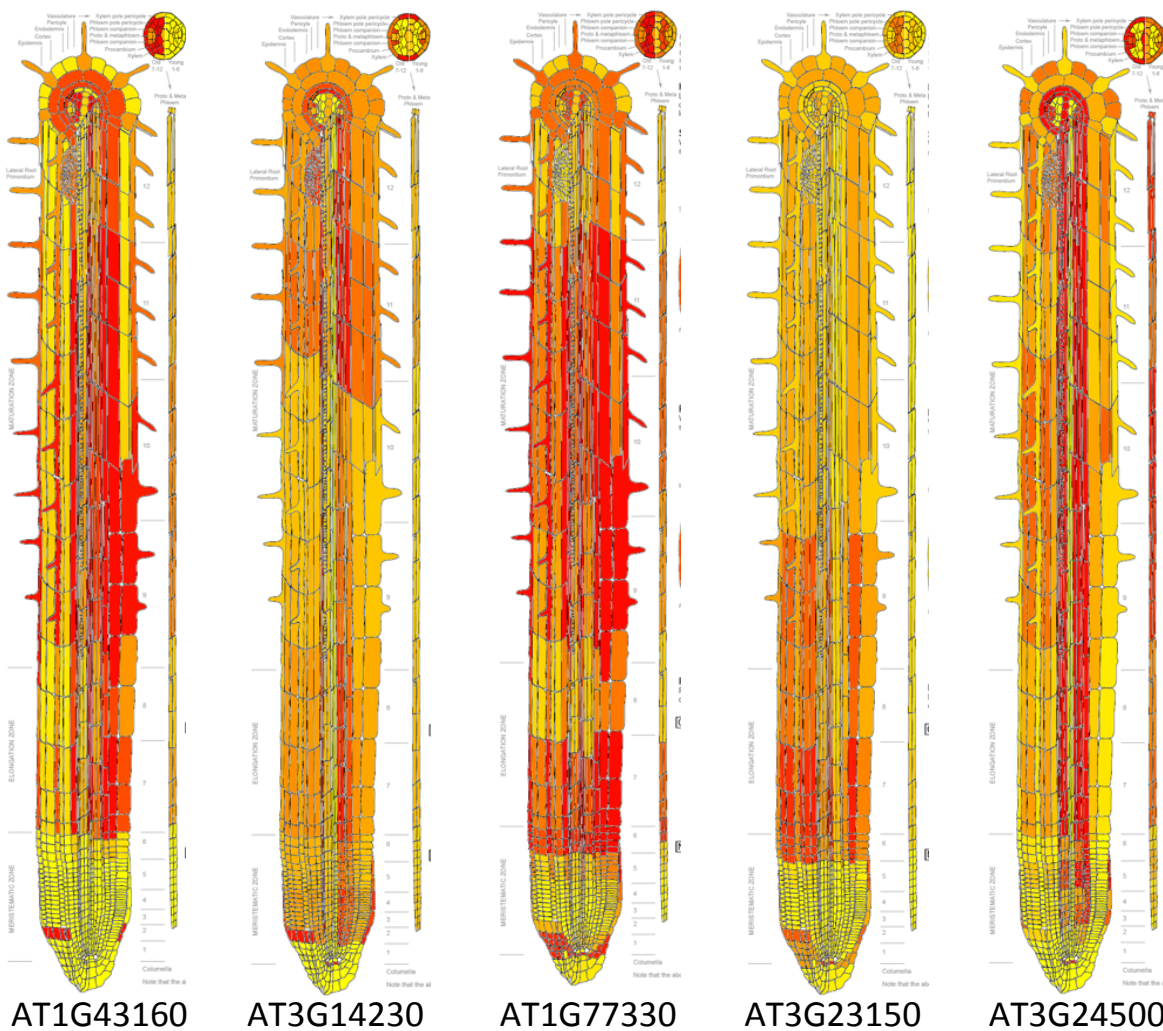

**B**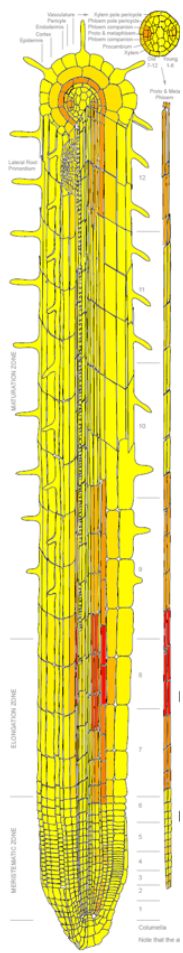

AT5G208200

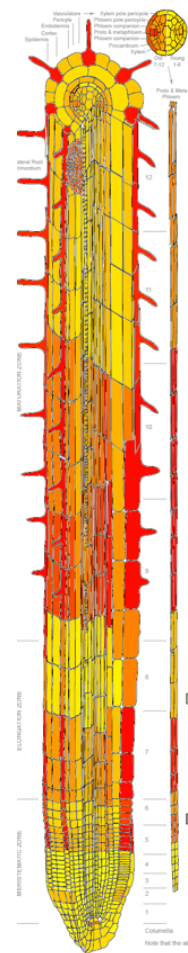

AT5G54490

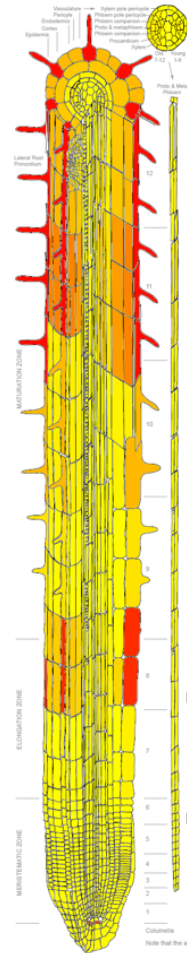

AT4G37390

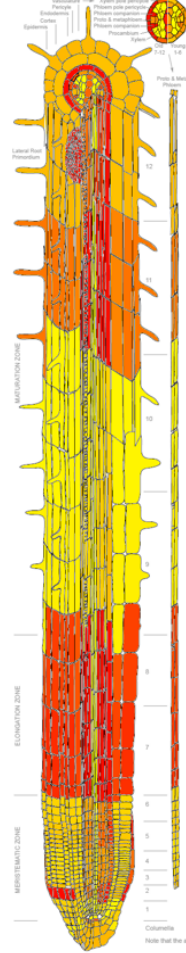

AT3G23030

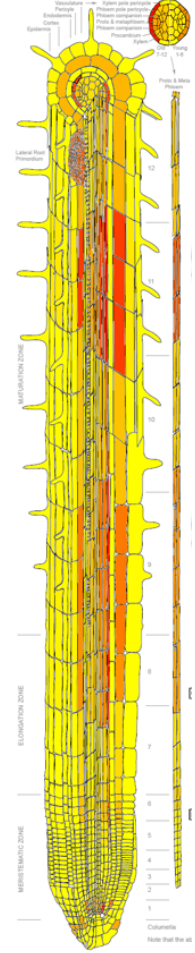

AT1G48690

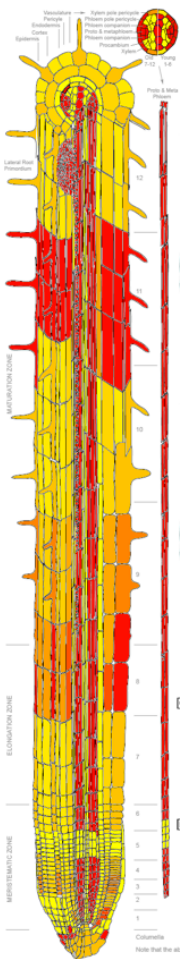

AT2G33830

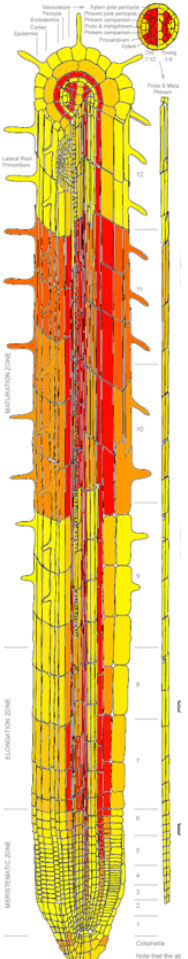

AT4G17280



D

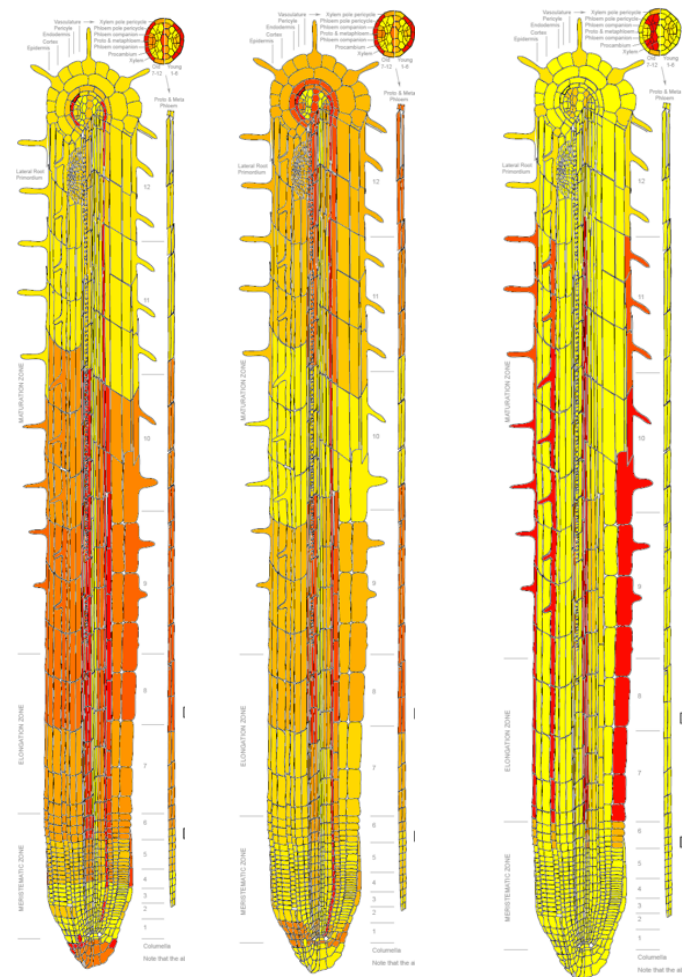

AT5G19890

AT1G49570

AT3G49960

**E**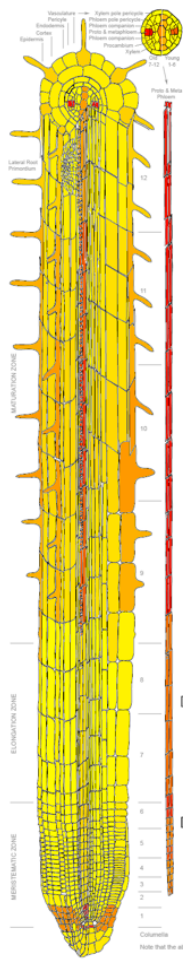**AT3G59900**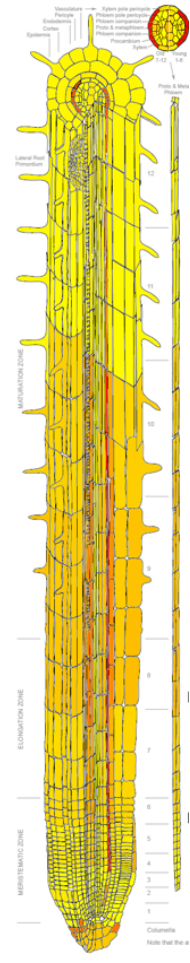**AT5G19890**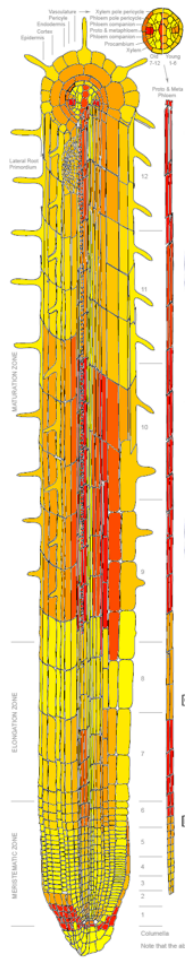**AT2G44080**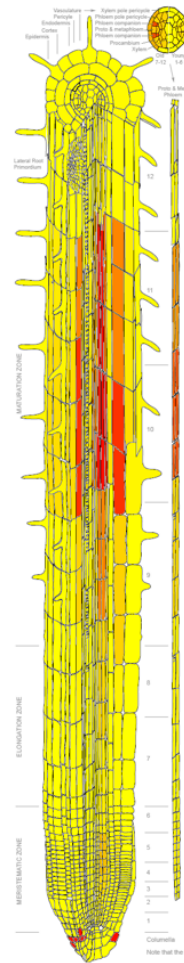**AT5G53980**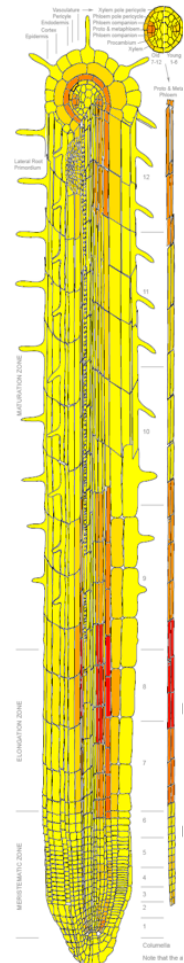**AT5G20820**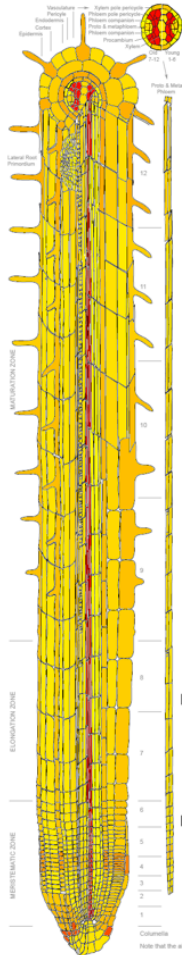**AT5G25340**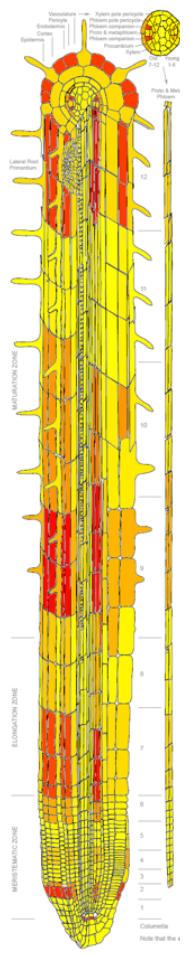**AT2G39980**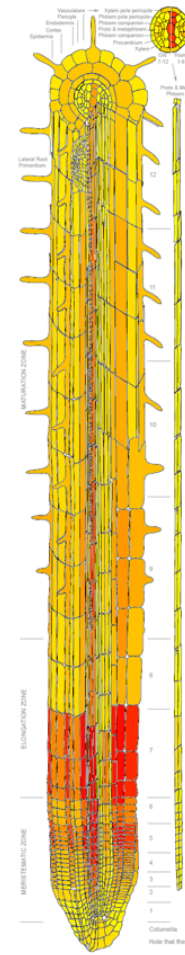**AT4G28050**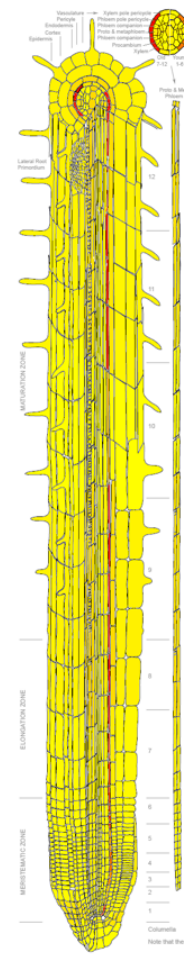**AT1G49570**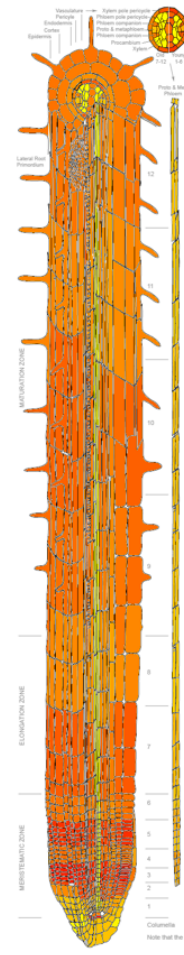**AT4G34110**

**F**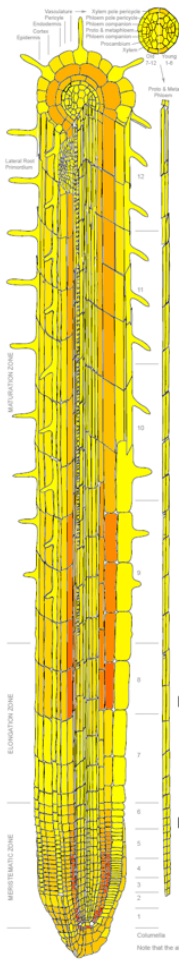

AT3G18000

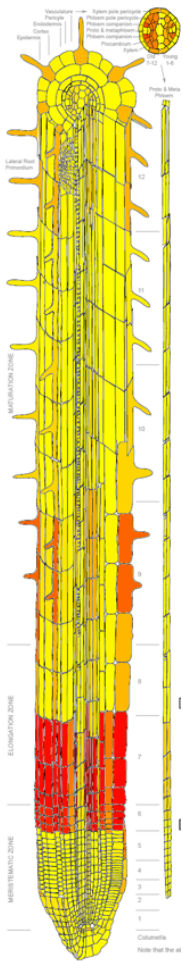

AT4G01630

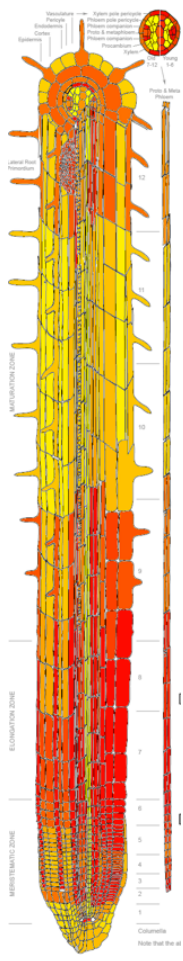

AT4G35100

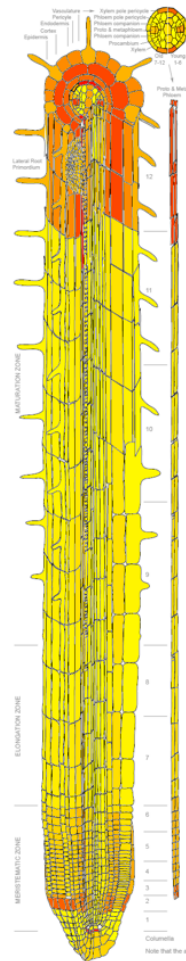

AT1G64390

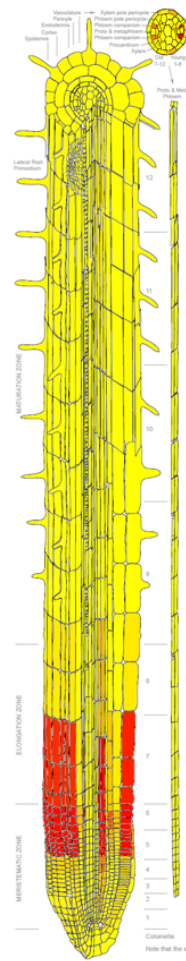

AT4G25250

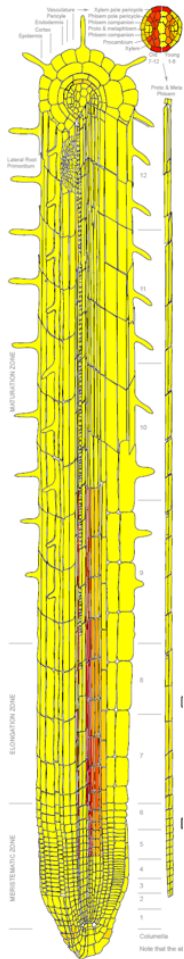

AT2G18800

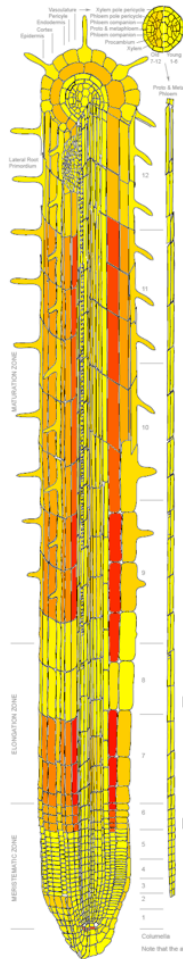

AT5G42590

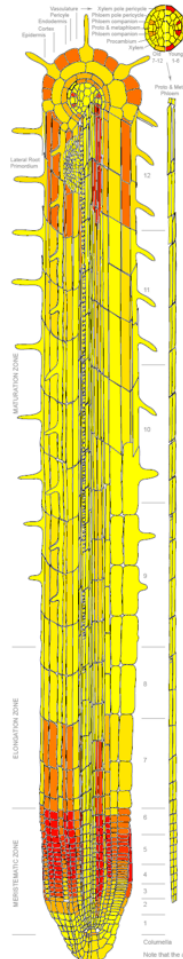

AT2G33790

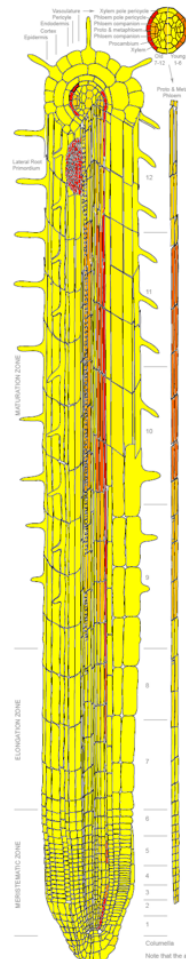

AT3G25190

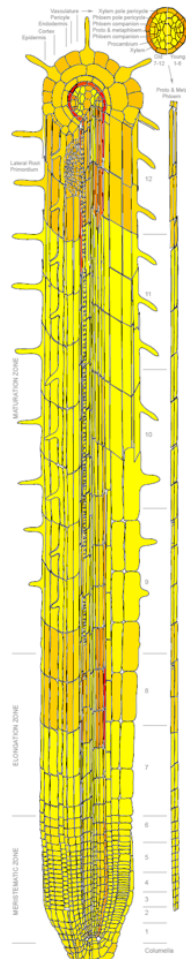

AT4G28250
