# Supplementary material for: Identification of genes involved in the ACC-mediated control of root cell elongation in Arabidopsis thaliana
Source: PubMed Central journal article supplement (PMC3502322; doi:10.1186/1471-2229-12-208), 2012-11-07
Supplement: 1471-2229-12-208-S4.pdf [file 1471-2229-12-208-S4.pdf]

**A**

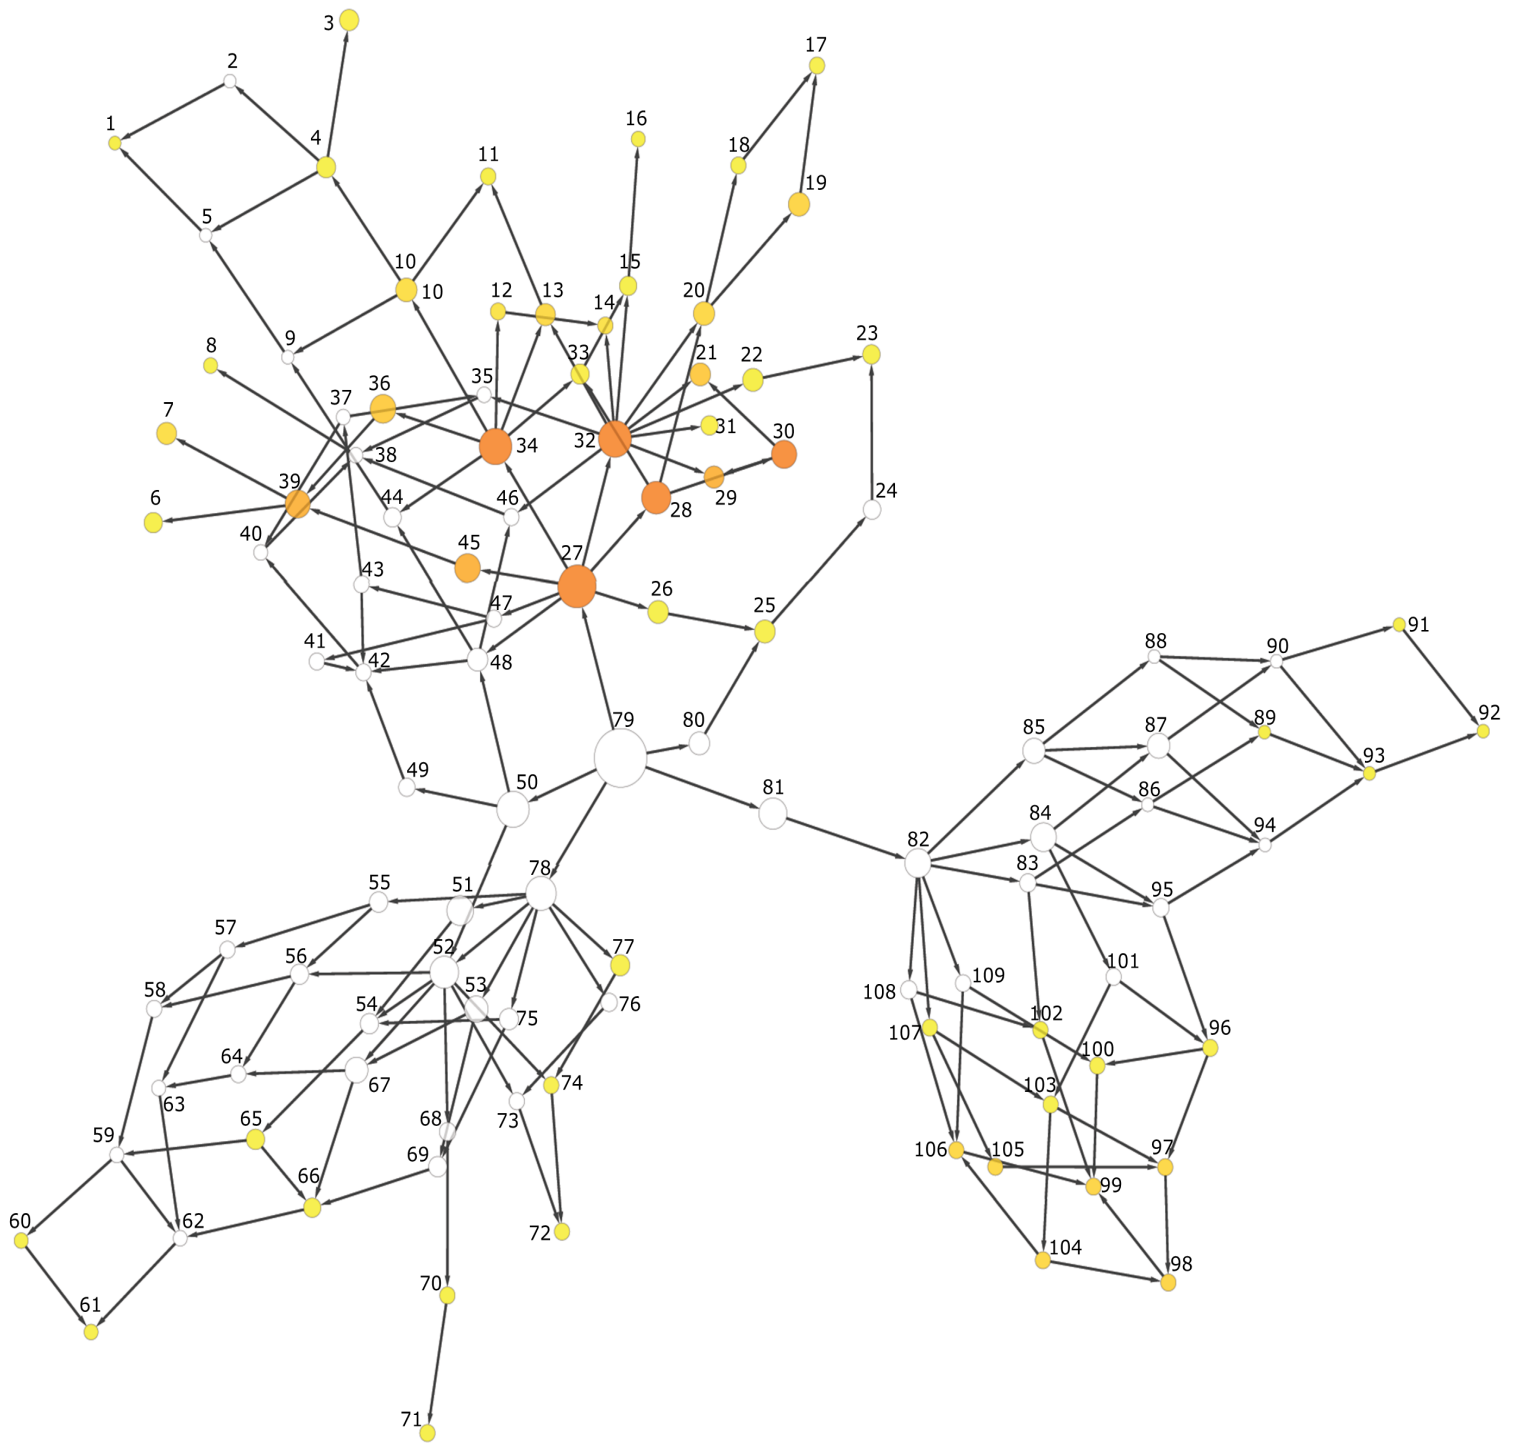

$5.00E-2$

$< 5.00E-7$

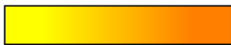

**B**

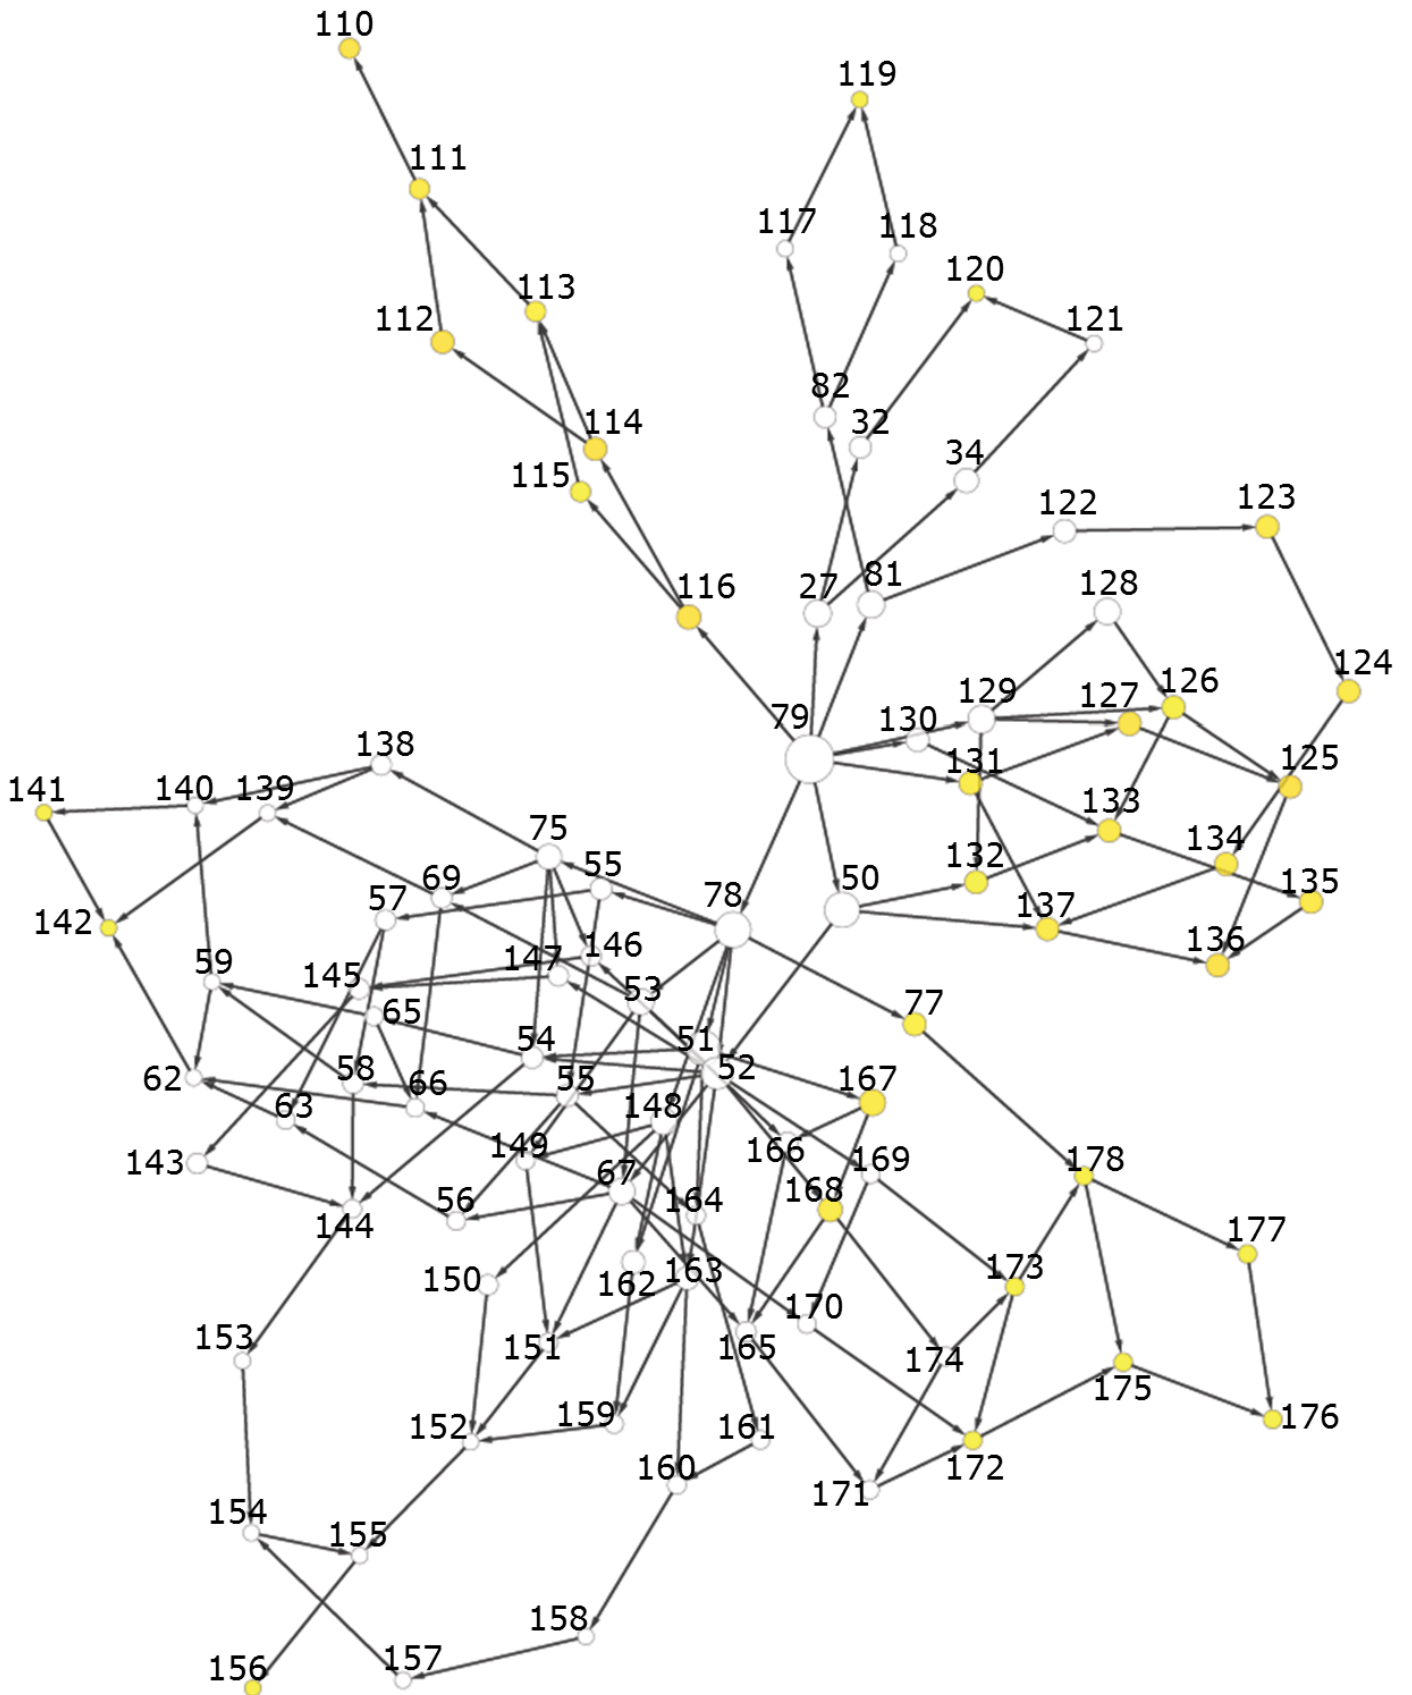

|                                                      |                                                          |
|------------------------------------------------------|----------------------------------------------------------|
| 1. cellular response to selenium ion                 | 2. response to selenium ion                              |
| 3. response to cadmium ion                           | 4. response to metal ion                                 |
| 5. cellular response to metal ion                    | 6. response to auxin stimulus                            |
| 7. response to abscisic acid stimulus                | 8. cellular response to sulfate starvation               |
| 9. cellular response to inorganic substance          | 10. response to inorganic substance                      |
| 11. response to reactive oxygen species              | 12. response to oxygen levels                            |
| 13. response to oxidative stress                     | 14. response to hypoxia                                  |
| 15. response to water deprivation                    | 16. response to desiccation                              |
| 17. hyperosmotic salinity response                   | 18. hyperosmotic response                                |
| 19. response to salt stress                          | 20. response to osmotic stress                           |
| 21. response to cold                                 | 22. defense response                                     |
| 23. defense response to bacterium                    | 24. response to bacterium                                |
| 25. response to other organism                       | 26. response to biotic stimulus                          |
| 27. response to stimulus                             | 28. response to abiotic stimulus                         |
| 29. response to heat                                 | 30. response to temperature stimulus                     |
| 31. response to wounding                             | 32. response to stress                                   |
| 33. response to water                                | 34. response to chemical stimulus                        |
| 35. response to starvation                           | 36. response to organic substance                        |
| 37. response to nutrient levels                      | 38. cellular response to starvation                      |
| 39. response to hormone stimulus                     | 40. cellular response to nutrient levels                 |
| 41. cellular response to external stimulus           | 42. cellular response to extracellular stimulus          |
| 43. response to extracellular stimulus               | 44. cellular response to chemical stimulus               |
| 45. response to endogenous stimulus                  | 46. cellular response to stress                          |
| 47. response to external stimulus                    | 48. cellular response to stimulus                        |
| 49. cell communication                               | 50. cellular process                                     |
| 51. primary metabolic process                        | 52. cellular metabolic process                           |
| 53. biosynthetic process                             | 54. cellular amino acid and derivative metabolic process |
| 55. nitrogen compound metabolic process              | 56. cellular nitrogen compound metabolic process         |
| 57. amine metabolic process                          | 58. cellular amine metabolic process                     |
| 59. cellular biogenic amine metabolic process        | 60. polyamine metabolic process                          |
| 61. polyamine biosynthetic process                   | 62. cellular biogenic amine biosynthetic process         |
| 63. amine biosynthetic process                       | 64. cellular nitrogen compound biosynthetic process      |
| 65. cellular amino acid derivative metabolic process | 66. cellular amino acid derivative biosynthetic process  |
| 67. cellular biosynthetic process                    | 68. generation of precursor metabolites and energy       |
| 69. small molecule biosynthetic process              | 70. energy derivation by oxidation of organic compounds  |
| 71. cellular respiration                             | 72. toxin catabolic process                              |
| 73. cellular catabolic process                       | 74. toxin metabolic process                              |
| 75. small molecule metabolic process                 | 76. catabolic process                                    |
| 77. secondary metabolic process                      | 78. metabolic process                                    |
| 79. biological process                               | 80. multi-organism process                               |
| 81. biological regulation                            | 82. regulation of biological process                     |
| 83. negative regulation of biological process        | 84. regulation of cellular process                       |
| 85. regulation of metabolic process                  | 86. negative regulation of metabolic process             |
| 87. regulation of cellular metabolic process         | 88. regulation of catabolic process                      |
| 89. negative regulation of catabolic process         | 90. regulation of cellular catabolic process             |
| 91. regulation of autophagy                          | 92. negative regulation of autophagy                     |

|                                                                |                                                                                    |
|----------------------------------------------------------------|------------------------------------------------------------------------------------|
| 93. negative regulation of cellular catabolic process          | 94. negative regulation of cellular metabolic process                              |
| 95. negative regulation of cellular process                    | 96. negative regulation of cell communication                                      |
| 97. negative regulation of signal transduction                 | 98. negative regulation of two-component signal transduction system (phosphorelay) |
| 99. negative regulation of ethylene mediated signaling pathway | 100. negative regulation of signaling pathway                                      |
| 101. regulation of cell communication                          | 102. negative regulation of response to stimulus                                   |
| 103. regulation of signal transduction                         | 104. regulation of two-component signal transduction system (phosphorelay)         |
| 105. negative regulation of signaling process                  | 106. regulation of ethylene mediated signaling pathway                             |
| 107. regulation of signaling process                           | 108. regulation of response to stimulus                                            |
| 109. regulation of signaling pathway                           | 110. plant-type cell wall loosening                                                |
| 111. plant-type cell wall modification                         | 112. cell wall modification                                                        |
| 113. plant-type cell wall organization                         | 114. cell wall organization                                                        |
| 115. plant-type cell wall organization or biogenesis           | 116. cell wall organization or biogenesis                                          |
| 117. regulation of circadian rhythm                            | 118. positive regulation of biological                                             |
| 119. positive regulation of circadian rhythm                   | 120. response to herbicide                                                         |
| 121. response to toxin                                         | 122. regulation of biological quality                                              |
| 123. regulation of anatomical structure size                   | 124. regulation of cellular component size                                         |
| 125. developmental growth involved in morphogenesis            | 126. anatomical structure morphogenesis                                            |
| 127. developmental growth                                      | 128. anatomical structure development                                              |
| 129. developmental process                                     | 130. cellular component organization                                               |
| 131. growth                                                    | 132. cellular developmental process                                                |
| 133. cellular component morphogenesis                          | 134. regulation of cell size                                                       |
| 135. cell morphogenesis                                        | 136. unidimensional cell growth                                                    |
| 137. cell growth                                               | 138. alcohol metabolic process                                                     |
| 139. alcohol biosynthetic process                              | 140. ethanolamine and derivative metabolic process                                 |
| 141. choline metabolic process                                 | 142. choline biosynthetic process                                                  |
| 143. carboxylic acid metabolic process                         | 144. cellular amino acid metabolic process                                         |
| 145. oxoacid metabolic process                                 | 146. organic acid metabolic process                                                |
| 147. cellular ketone metabolic process                         | 148. macromolecule metabolic process                                               |
| 149. macromolecule biosynthetic process                        | 150. gene expression                                                               |
| 151. cellular macromolecule biosynthetic process               | 152. translation                                                                   |
| 153. amino acid activation                                     | 154. tRNA aminoacylation                                                           |
| 155. tRNA aminoacylation for protein translation               | 156. leucyl-tRNA aminoacylation                                                    |
| 157. tRNA metabolic process                                    | 158. ncRNA metabolic process                                                       |
| 159. cellular protein metabolic process                        | 160. RNA metabolic process                                                         |
| 161. nucleic acid metabolic process                            | 162. protein metabolic process                                                     |
| 163. cellular macromolecule metabolic process                  | 164. nucleobase, nucleoside, nucleotide and nucleic acid metabolic process         |
| 165. cellular carbohydrate biosynthetic process                | 166. carbohydrate biosynthetic process                                             |
| 167. carbohydrate metabolic process                            | 168. cellular carbohydrate metabolic process                                       |
| 169. sulfur metabolic process                                  | 170. sulfur compound biosynthetic process                                          |
| 171. glycoside biosynthetic process                            | 172. S-glycoside biosynthetic process                                              |

|                                         |                                         |
|-----------------------------------------|-----------------------------------------|
| 173. S-glycoside metabolic process      | 174. glycoside metabolic process        |
| 175. glucosinolate biosynthetic process | 176. glucosinolate biosynthetic process |
| 177. glucosinolate metabolic process    | 178. glucosinolate metabolic process    |
